1

2 **Tau-mediated axonal degeneration is prevented by activation of the Wld<sup>S</sup> pathway**

3

4 <sup>1</sup>Katy Stubbs, <sup>1</sup>Megan Sealey, <sup>1</sup>Miguel Ramirez Moreno, <sup>1</sup>V Hugh Perry, <sup>2\*</sup>Tracey A

5 Newman and <sup>1\*</sup>Amritpal Mudher

6 1. Biological Sciences, Faculty of Environment and Life Sciences, University of

7 Southampton, Highfield Campus, Southampton, SO17 1BJ

8 2. Clinical and Experimental Science, Faculty of Medicine, University of Southampton,

9 Highfield Campus, Southampton, SO17 1BJ

10 Joint corresponding authors: Dr Tracey Newman and Dr Amritpal Mudher.

11 **Keywords:** tauopathy, axonal degeneration, Wallerian degeneration, Wld<sup>S</sup>

12

13

14

15

16

17

18

19

20 **Abstract**

21 Tauopathy is characterised by neuronal dysfunction and degeneration occurring as a result of  
22 changes to the microtubule associated protein tau. The neuronal changes evident in Tauopathy  
23 bear striking morphological resemblance to those reported in models of Wallerian  
24 degeneration. The mechanisms underpinning Wallerian degeneration are not fully understood  
25 although it can be delayed by the expression of the slow Wallerian degeneration (Wld<sup>S</sup>) protein,  
26 which has also been demonstrated to delay axonal degeneration in some models of  
27 neurodegenerative disease. Given the morphological similarities between tauopathy and  
28 Wallerian degeneration, this study investigated whether tau-mediated phenotypes can be  
29 modulated by expression of Wld<sup>S</sup>. In a *Drosophila* model of tauopathy in which expression of  
30 human Tau protein (hTau<sup>0N3R</sup>) leads to progressive age-dependent phenotypes, activation of  
31 the pathway downstream of Wld<sup>S</sup> completely suppressed tau-mediated degeneration. This  
32 protective effect was evident even if the pathway downstream of Wld<sup>S</sup> was activated several  
33 weeks after hTau-mediated degeneration had become established. In contrast, Wld<sup>S</sup> expression  
34 without activation of the downstream protective pathway did not rescue tau-mediated  
35 degeneration in adults or improve tau-mediated neuronal dysfunction including deficits in  
36 axonal transport, synaptic alterations and locomotor behaviour in hTau<sup>0N3R</sup>-expressing larvae.  
37 This collectively implies that the pathway mediating the protective effect of Wld<sup>S</sup> intersects  
38 with the mechanism(s) of degeneration initiated by hTau and can effectively halt tau-mediated  
39 degeneration at both early and late stages. Understanding the mechanisms underpinning this  
40 protection could identify much-needed disease-modifying targets for tauopathies.

41

42

43

44

## 45 Introduction

46 Tau pathology is observed in numerous neurodegenerative diseases, including Alzheimer's  
47 disease, Parkinson's disease (PD), motor neuron disease (MND) and a variety of other  
48 tauopathies such as fronto-temporal dementia, Pick's Disease, progressive supra-nuclear palsy  
49 and others. The axon is susceptible to tau pathology in these neurodegenerative diseases, with  
50 evidence of white matter changes indicative of axonal degeneration in tauopathies such as AD  
51 (1-3). Studies in animal models have demonstrated that axonal dysfunction in tauopathy is  
52 typified by disrupted axonal transport (4, 5) (6), due to tau hyperphosphorylation resulting in  
53 reduced cytoskeletal integrity (7). Axonal swellings and loss of white matter, hallmarks of  
54 axonal degeneration have been observed in P301L-tau mice, a model of familial fronto-  
55 temporal dementia (8) (9) (10).

56

57 Wallerian degeneration describes the sequential degeneration of axons following axonal injury  
58 which begins with breakdown of the cytoskeleton and ends with the fragmentation and loss of  
59 the separated distal axon (11). Wallerian degeneration and axonal degeneration in  
60 neurodegenerative disease share similarities including cytoskeletal breakdown (7) (12),  
61 disrupted axonal transport (13) (14), alterations to mitochondrial morphology (15) (16), and in  
62 the central nervous system (CNS), axonal swellings (12) (17). These similarities suggest that  
63 the mechanisms overlap and the term Wallerian-like may be used to describe degeneration that  
64 is not due to an acute injury.

65

66 The discovery of the slow Wallerian degeneration (Wld<sup>S</sup>) protective mutation, which robustly  
67 delays Wallerian degeneration (18), identified a molecular pathway controlling axonal  
68 degeneration after injury [reviewed in (19) (20) (21) (22)]. Wld<sup>S</sup> has been studied in  
69 experimental models to elucidate the molecular pathway and explore whether it underpins the

70 Wallerian-like degeneration observed in a variety of neurodegenerative conditions. This work  
71 has identified delayed degeneration in models of disease including: Multiple sclerosis (23),  
72 Parkinson's disease (24) (25), Charcot-Marie-Tooth disease type 1A (26) and 1B (27) and toxic  
73 neuropathy (28).

74

75 Considering that the axon is a site of tau-mediated dysfunction and degeneration, the aim of  
76 the present study was to investigate whether the axonal protection mediated by Wld<sup>S</sup> was able  
77 to rescue tau-mediated axonal dysfunction and degeneration. *Drosophila melanogaster* has  
78 been used in the study of Wallerian degeneration and Wld<sup>S</sup> (29) (30) (31) (32) (33) (34), and  
79 *Drosophila* models of tauopathy are similarly well-established (5) (35) (36) . Furthermore,  
80 several studies are beginning to implicate components of Wld<sup>S</sup> (such as nicotinamide  
81 mononucleotide adenylyl transferase – NMNAT) in tau-mediated aggregation and  
82 degeneration in both rodent and *Drosophila* models (37) (38) (39). To investigate whether  
83 Wallerian-like degeneration in tauopathy is Wld<sup>S</sup>-sensitive we studied the structural and  
84 functional effects of co-expression of human tau (hTau<sup>0N3R</sup>) and Wld<sup>S</sup> in *Drosophila*.

85

86 Our findings demonstrate that co-expression of Wld<sup>S</sup> does not confer protection against hTau  
87 mediated dysfunction or degeneration. However, in stark contrast, activation of the pathway  
88 downstream of Wld<sup>S</sup> results in profound protection, both preventing and arresting degeneration  
89 even in neurons already affected by tau-induced pathology.

## 90 [Materials and methods](#)

### 91 [Fly stocks](#)

92 *Drosophila* were raised and maintained on standard Bloomington media at 23°C with a 12/12 h  
93 light/dark cycle. UAS-htau<sup>0N3R</sup>, elav-GAL4, D42-GAL4 and Oregon R flies were obtained  
94 from the Bloomington Drosophila Stock Centre (Indiana, IN, USA). The UAS-Wld<sup>S</sup> and UAS-

95 mCD8::GFP, Or47b-GAL4/Cyo lines were obtained from Professor Liqun Luo (Stanford  
96 University, CA, USA (40)). The D42-GAL4, UAS-NPY::GFP line was generated previously  
97 (5), with UAS-NPY::GFP provided by Dr Ian Robinson (Plymouth University, UK). A  
98 homozygous *htau*<sup>0N3R</sup>; *Wld*<sup>S</sup> line was generated for the current study by crossing UAS-*htau*<sup>0N3R</sup>  
99 with UAS-*Wld*<sup>S</sup> lines.

100

#### 101 [Axonal transport analysis](#)

102 Transgenes were expressed using D42-GAL4, UAS-NPY::GFP, and third instar wandering  
103 larvae were selected for analysis. Larvae were anaesthetised using diethyl ether vapour  
104 (Thermo Fisher Scientific) and mounted in 1% agarose (Sigma-Aldrich) on glass slides, with  
105 the ventral surface facing the coverslip. Peripheral nerves were imaged using an Axioplan2  
106 MOT upright fluorescence microscope (Zeiss) equipped with Micro Max CCD (Princeton  
107 Instruments) using MetaMorph acquisition software (Molecular Devices). Images were  
108 thresholded and the area covered by aggregates measured using Metamorph software.

109

#### 110 [Larval neuromuscular junction \(NMJ\) analysis](#)

111 Transgenes were expressed using D42-GAL4, and third instar wandering larvae dissected, with  
112 internal organs removed and the skin pinned out and fixed in 4% formaldehyde (Sigma-  
113 Aldrich) for 90 mins at room temperature. Larval skins were then washed in 0.1% Triton X  
114 (Sigma-Aldrich) in phosphate-buffered saline (PBS-Tx; Thermo Fisher Scientific) prior to  
115 blocking in 5% goat serum, 3% horse serum and 2% bovine serum albumin (BSA; Sigma-  
116 Aldrich) in 0.1% PBS-Tx. Skins were incubated with goat anti-horseradish peroxidase (1:1000;  
117 ICN/Cappel), conjugated to fluorescein isothiocyanate. Skins were washed in 0.1% PBS-Tx  
118 and put through an ascending glycerol series (50, 70, 90 and 100%) before being mounted in  
119 Vectashield (Vector Laboratories) and imaged. NMJ's on muscle 4 from segments A3-5 were

120 imaged using a Leica SP2 scanning confocal microscope using the 488 argon laser. Maximum  
121 projections of Z stacks were generated for morphometric analysis; bouton size and interbouton  
122 axon width were measured using ImageJ with the assessor blinded to the sample number.

123

#### 124 Larval locomotion

125 Larval behaviour was assessed as previously described (41). In brief, D42-GAL4 driven third  
126 instar wandering larvae were each placed in the centre of 0.3% Albian Blue (Sigma-Aldrich),  
127 1% agarose (Sigma-Aldrich) plates, and videos of larval behaviour recorded. Videos of larval  
128 locomotion were analysed using Ethovision 3.0 (Noldus) tracking software.

129

130

#### 131 Immunohistochemical analysis of axonal degeneration

132 Adults were collected 0-2 days after eclosion from UAS-mCD8::GFP, Or47b-GAL4 driven  
133 crosses and aged to the relevant time point. Flies were anaesthetised with CO<sub>2</sub>, heads were  
134 ligated and the brains dissected and placed in 4% formaldehyde and fixed at room temperature  
135 for 45 minutes. Following fixation, brains were washed in 0.1% PBS-Tx before either  
136 mounting in Vectashield or proceeding for staining. Those to be stained were blocked in 5%  
137 goat serum, 3% horse serum, 2% BSA in 0.1% PBS-Tx and stained with rabbit anti-human tau  
138 antibodies (1:1000; Dako) or mouse anti-phospho tau PHF-1 (1:1000 – thermofisher), washed  
139 and incubated in goat anti-rabbit or anti-mouse Alexa Fluor 563 (1:1000; Invitrogen; Thermo  
140 Fisher Scientific). Brains were washed and mounted in Vectashield prior to imaging on an  
141 Axioplan2 MOT upright Epifluorescence microscope (Zeiss) equipped with a QImaging Retiga  
142 3000 CCD Camera (Photometrics) and images were acquired using Metamorph software  
143 (Molecular Devices). Images were quantified in ImageJ with the assessor blinded to genotype

144 and timepoint. For axonal swellings, images were thresholded and the coverage of swellings  
145 measured.

146

147 [Axon injury to activate the pathway downstream of Wld<sup>S</sup> \(referred to as Wld<sup>S</sup> pathway-](#)  
148 [activation\)](#)

149 The third antennal segment was removed from flies, 1 or 3 weeks after eclosion from Or47b-  
150 GAL4 driven crosses, under CO<sub>2</sub> anaesthesia using Dumont #5 forceps. This induced an axonal  
151 injury in olfactory receptor neurons (ORNs), whose cell bodies are located in the third antennal  
152 segment. At the relevant time points, brains were dissected as described above. Degeneration  
153 was quantified by previously described methods (42). Briefly, with the assessor blind to  
154 genotype and time point, the presence of the commissural axons was recorded (Y/N) and the  
155 percentage of brains of each genotype at each time point with intact axons was calculated. The  
156 intensity of GFP signal within glomeruli was measured using ImageJ and the background  
157 intensity was subtracted.

158

## 159 [Statistics](#)

160 Statistical analysis was conducted using GraphPad Prism, version 6.0 (GraphPad Software,  
161 Inc.), using analysis of variance and the Bonferroni correction for the comparison of groups.  
162 The Mantel-Cox test was used for survival analysis, with the Bonferroni correction used for  
163 the comparison of multiple groups. Values are presented as the mean  $\pm$  standard error.  $P < 0.05$   
164 was considered to indicate a statistically significant difference.

## 165 [Results](#)

166 [Activation of the pathway downstream of Wld<sup>S</sup> protects against hTau<sup>ON3R</sup>-induced degeneration](#)

167 Though previous studies of injury models indicate that the presence of Wld<sup>S</sup> within the axon is  
168 crucial for its protection (33-35), the findings from chronic models of disease do not show any

169 consistent or significant Wld<sup>S</sup>-mediated protection despite clear evidence of Wallerian-like  
170 degeneration in these models (31) (32) (34). One explanation for this lack of rescue could be  
171 that the pathway that Wld<sup>S</sup> is acting in is not “activated” in these models of chronic  
172 degeneration, raising the possibility that the protein may require some form of injury to unmask  
173 its protective effect. Indeed, in all cases where Wld<sup>S</sup> has been reported to rescue axonal  
174 degeneration, the neurons are injured by default as part of the experimental paradigm (22) (26)  
175 (35) (36).

176

177 To explore whether injury-induced “activation” was required for the Wld<sup>S</sup> pathway to protect  
178 against tau-mediated degeneration, hTau<sup>0N3R</sup>;Wld<sup>S</sup> axons of the olfactory receptor neurons  
179 (ORNs) expressing membrane bound GFP were injured (axotomised) by removal of the third  
180 antennal segments as previously described (42). Adult brains were analysed after eclosion at  
181 hourly (h) or weekly (w) time points post-axotomy induced Wld<sup>S</sup> pathway activation (referred  
182 to as “pa” from here on). This revealed that control and tau expressing axons had degenerated  
183 at 2w after eclosion/1wpa. In contrast hTau<sup>0N3R</sup>;Wld<sup>S</sup> expressing axons were intact at this time  
184 point (data not shown) confirming that the axotomy paradigm “activated” the pathway  
185 downstream of Wld<sup>S</sup>. To ascertain the extent to which activation of the Wld<sup>S</sup> pathway protected  
186 against tau-mediated degeneration, the prominent degenerative features of tau-expressing  
187 axons were quantified. Axonal swellings, which are characteristic of tau-mediated axonal  
188 degeneration, were present in naïve hTau<sup>0N3R</sup>;Wld<sup>S</sup> axons (arrowheads Fig 1ai). In contrast  
189 these were not found in hTau-animals of the same genotype after activation of the Wld<sup>S</sup>  
190 pathway (Fig. 1aai). The progressive accumulation of axonal swellings is evident in hTau  
191 expressing animals within 2 weeks after eclosion and triples by week 5. In contrast swellings  
192 were not seen at any time point in hTau<sup>0N3R</sup>;Wld<sup>S</sup> expressing animals where the activation of  
193 the Wld<sup>S</sup> pathway was elicited through axotomy (Fig. 1b). This illustrates that once activated,



194 the Wld<sup>S</sup> pathway protects against the initiation and development of tau-mediated axonal  
195 degeneration.

196

197 To study a more disease-relevant situation we investigated whether activation of the Wld<sup>S</sup>  
198 pathway protected against already established tau-mediated axonal degeneration. The Wld<sup>S</sup>  
199 pathway was activated at 3w after eclosion, a time at which axonal swellings are already  
200 established in hTau<sup>0N3R</sup>-expressing axons. In hTau<sup>0N3R</sup>;Wld<sup>S</sup> axons where Wld<sup>S</sup> pathway was  
201 not activated, a progressive increase in axonal swellings is evident with time, such that axonal  
202 swellings at 4w after eclosion are 4-fold greater than those seen at 3w after eclosion, with this  
203 increasing further by 6w after eclosion (P<0.001; Fig 2a). At these later time points the  
204 swellings in the naïve hTau<sup>0N3R</sup>;Wld<sup>S</sup> axons are significantly greater than those seen in the  
205 naïve Wld<sup>S</sup> axons which serve as the controls. In contrast activation of the Wld<sup>S</sup> pathway halts  
206 the development of axonal swelling. Olfactory receptor neurons in flies expressing hTau;Wld<sup>S</sup>  
207 showed the anticipated accumulation of axonal swellings at 3w after eclosion, prior to Wld<sup>S</sup>  
208 pathway activation, but any further accumulation was halted once the Wld<sup>S</sup> pathway was  
209 activated (Fig. 2b) with no progression in pathology seen after this time. Once the pathway  
210 downstream of Wld<sup>S</sup> was activated, the axonal swellings in hTau<sup>0N3R</sup>;Wld<sup>S</sup> animals were not  
211 significantly different to those seen in controls at any time point. This indicates that in addition  
212 to preventing the emergence of tau-mediated axonal degeneration (as shown in Fig 1),  
213 activation of the Wld<sup>S</sup> pathway can also halt the progression of tau-mediated axonal  
214 degeneration once it has begun.

215

216 Expression of Wld<sup>S</sup> without “activation” of the downstream pathway is insufficient to protect  
217 against hTau<sup>0N3R</sup>-induced phenotypes

218 The results indicate that activation of the pathway downstream of Wld<sup>S</sup> potentially suppresses  
219 hTau-mediated degeneration. This supports our hypothesis that the lack of protection through  
220 co-expression of Wld<sup>S</sup> in chronic models of degeneration (31) (32) (33) (34) is because the  
221 pathway that Wld<sup>S</sup> acts in is not normally “activated” in otherwise naïve axons. Acute injury  
222 to an axon “activates” it unmasking its protective effect. However, as the previous studies were  
223 conducted in rodents, we sought to ascertain whether the “protection requires pathway  
224 activation” phenomenon that we described in Figs 1 and 2 holds true in our invertebrate model  
225 as well.

226

227 To prove that expression of Wld<sup>S</sup> is insufficient for protection against hTau<sup>0N3R</sup>-mediated  
228 degeneration and that “activation” of the pathway downstream is required, degeneration in  
229 naïve hTau<sup>0N3R</sup>;Wld<sup>S</sup> flies was studied in the absence of “activation”. ORNs expressing  
230 membrane-bound GFP underwent progressive age-related axonal degeneration in all hTau<sup>0N3R</sup>  
231 expressing flies. This was characterised by the appearance of axonal swellings at 2-3 weeks  
232 after eclosion, which increased in number and size as the flies aged (Fig. 3a/b hTau<sup>0N3R</sup>  
233 column). Axonal swellings were also evident in controls and Wld<sup>S</sup> flies, but only at older, 5-7  
234 week time points (Fig. 3a control and Wld<sup>S</sup> columns). Noticeably, these swellings were also  
235 apparent in hTau<sup>0N3R</sup>;Wld<sup>S</sup> flies (where the Wld<sup>S</sup> pathway had not been activated - Fig 3a  
236 hTau<sup>0N3R</sup>;Wld<sup>S</sup> column). Quantification confirmed that there was no significant difference in  
237 onset, extent or progression of axonal swellings in the hTau<sup>0N3R</sup>;Wld<sup>S</sup> flies when compared  
238 with hTau<sup>0N3R</sup> alone (Fig. 3a/b).

239 These results suggest that simply co-expressing Wld<sup>S</sup> does not protect against tau-mediated  
240 degeneration. We next sought to investigate whether this is also the case in larvae, where tau-

241 mediated neuronal dysfunction manifests in profound Wallerian-like axonal phenotypes  
242 including disrupted axonal transport and destabilisation of the cytoskeleton (5) (7). Using a  
243 *Drosophila* line expressing GFP-tagged neuropeptide Y in motor neurons, axonal transport was  
244 visualised using microscopy in live intact third instar larvae. As reported previously, numerous  
245 large vesicular aggregates were found in tau-expressing larvae indicative of axonal transport  
246 disruption (Fig. 4a). However, these aggregates were also observed in hTau<sup>0N3R</sup>;Wld<sup>S</sup> larvae.  
247 Quantification of the coverage areas of the aggregates indicated that the aggregates were not  
248 significantly reduced in hTau<sup>0N3R</sup>;Wld<sup>S</sup> larvae compared with hTau<sup>0N3R</sup> larvae (Fig. 4b).  
249  
250 HTau<sup>0N3R</sup> expression is associated with altered synaptic morphology, characterised by thinning  
251 of the inter-bouton axons and the appearance of minisatellite boutons (43). These features were  
252 observed in the current study (Fig. 4c) and this phenotype was not improved by co-expression  
253 of Wld<sup>S</sup>. No significant difference in the thickness of the inter-bouton axon (Fig. 4d) or the  
254 proportions of bouton of each size (Fig. 4e) were seen in the neuromuscular junctions of either  
255 hTau<sup>0N3R</sup>;Wld<sup>S</sup> or hTau<sup>0N3R</sup> expressing animals .  
256  
257 Disruption of axonal transport and altered synaptic morphology are associated with alterations  
258 in locomotor behaviour. Using an open field behavioural assay, the crawling behaviour of third  
259 instar larvae was investigated. When placed in the centre of an arena, control larvae quickly  
260 move towards the edge of the arena, following a straight path. In contrast, tau expressing larvae  
261 move more slowly and take a confused and twisting path, demonstrated by an increase in  
262 meander (turning per distance moved; Fig. 4f) and in angular velocity (turning per time elapsed;  
263 Fig. 4g) and the reduction in overall velocity (Fig. 4h). However, the co-expression of Wld<sup>S</sup>  
264 with hTau<sup>0N3R</sup> did not improve locomotor behaviour, with no significant difference between  
265 hTau<sup>0N3R</sup>;Wld<sup>S</sup> and hTau<sup>0N3R</sup> expressing larvae (Fig. 4f-h).

266 The adult and larval data collectively shows that without “activation” of the pathway  
267 downstream of Wld<sup>S</sup>, the protective effect of Wld<sup>S</sup> on hTau<sup>0N3R</sup>-mediated dysfunction (in  
268 larvae) or degeneration (in adult flies) is not uncovered.

269

270 *Activation of the Wld<sup>S</sup>-pathway protects against the effects of hTau<sup>0N3R</sup> without influencing*  
271 *total or phosphorylated tau levels*

272 The most parsimonious explanation for this curious phenomenon of injured-activated  
273 protection against hTau<sup>0N3R</sup> pathology, may simply be that hTau is lost from injured  
274 hTau<sup>0N3R</sup>;Wld<sup>S</sup> axons and therefore cannot exert its detrimental effects to cause axonal  
275 degeneration. To investigate this, hTau immunoreactivity was assessed in hTau-expressing  
276 animals with and without Wld<sup>S</sup>-pathway activation and both the amount of hTau and its cellular  
277 localisation was examined. No significant differences were found in hTau distribution or total  
278 hTau expression between these two groups; hTau staining persisted in injured hTau<sup>0N3R</sup>;Wld<sup>S</sup>  
279 axons even 5 weeks after Wld<sup>S</sup> activation (Fig. 5a) and there was no difference in total Tau  
280 levels (Fig 5b). This is remarkable because it implies that despite expression within the axon  
281 for 6 weeks, hTau has not caused degeneration in the hTau<sup>0N3R</sup>;Wld<sup>S</sup> axons once the Wld<sup>S</sup>  
282 pathway is activated. This begs the question as to how activation, of the Wld<sup>S</sup>-pathway protects  
283 against the human tau induced degeneration across this length of time.

284

285 Since hyper-phosphorylation has been shown to mediate tau toxicity in many *Drosophila*  
286 models (5) (7) (44), it is conceivable that the activated Wld<sup>S</sup>-pathway is altering the  
287 degenerative changes by reducing the levels of phosphorylated hTau. To investigate this, hTau  
288 phosphorylated at the PHF-1 site was quantified in hTau<sup>0N3R</sup>;Wld<sup>S</sup> axons with and without  
289 Wld<sup>S</sup>-pathway activation. There was a trend for a reduction in the PHF-1 signal in the  
290 hTau<sup>0N3R</sup>;Wld<sup>S</sup> flies where Wld<sup>S</sup> was activated but this was not significant (Fig 5c).

291 **Discussion**

292 The axonal compartment of neurons is susceptible to tau-mediated dysfunction and  
293 degeneration making it a potential therapeutic target in the treatment of neurodegenerative  
294 disease. This study demonstrates that when the pathway downstream of Wld<sup>S</sup> is “activated” in  
295 hTau<sup>0N3R</sup>;Wld<sup>S</sup> axons, tau-mediated axonal swellings *were prevented from forming*.  
296 Significantly, in animals allowed to develop axonal swellings due to hTau<sup>0N3R</sup> expression any  
297 further progression of pathology was halted after the Wld<sup>S</sup>-pathway was activated. This  
298 protective effect was seen without alterations in total tau and importantly was dependent on the  
299 activation of pathways downstream of Wld<sup>S</sup>. Understanding the mechanisms by which  
300 activation of the Wld<sup>S</sup>-protective pathway negates tau-mediated axonal degeneration could  
301 yield important insight into how axons degenerate in tauopathy and other similar chronic  
302 degenerative conditions, and provide novel disease-modifying targets that emulate this  
303 protective effect.

304

305 **Variable impact of Wld<sup>S</sup> overexpression in previous models of neurodegeneration: can this be**  
306 **explained by the need to “activate” pathway downstream of Wld<sup>S</sup> to uncover neuroprotection?**

307 Previous studies of Wld<sup>S</sup> in models of chronic neurodegeneration have indicated that  
308 expression of Wld<sup>S</sup> has variable effects on disease phenotypes. This was also evident in our  
309 study where no rescue of hTau<sup>0N3R</sup>-mediated neuronal dysfunction or degeneration was seen in  
310 either larvae or adults stages following mere co-expression of Wld<sup>S</sup>. Similar results were  
311 reported in the *SOD1-G93A* model of MND (45). Like this, there is a large body of conflicting  
312 evidence of Wld<sup>S</sup> sensitivity in chronic neurodegenerative diseases displaying Wallerian-like  
313 degeneration. Wld<sup>S</sup> did not alter axonal degeneration in models of prion disease (46), MND  
314 (45) (47) and hereditary spastic paraplegia (48). In contrast, in models that investigate

315 degeneration with an acute onset, such as toxic neuropathy (28), ischaemic injury (49) and  
316 MPTP induced-Parkinsonism (24) (50) a protective effects of Wld<sup>S</sup> is reported.

317

318 One interpretation of the dissimilar effect of Wld<sup>S</sup> in models of acute and chronic  
319 neurodegeneration and their variable sensitivity to Wld<sup>S</sup> could be a different mechanism of  
320 axonal degeneration occurring in acute compared with chronic neurodegenerative conditions.

321 Another explanation for the variable sensitivity to Wld<sup>S</sup> in models of chronic  
322 neurodegeneration could simply be that its protective effect is a general delaying of  
323 degeneration which is not always apparent in the time period assayed in the chronic models in

324 question. Our data imply that this is unlikely to be the case since no protective effect emerged  
325 at even very late time points when Wld<sup>S</sup> was simply expressed with hTau<sup>ON3R</sup> (Fig 1). Instead,

326 we propose and that another explanation may be provided by a key difference between the  
327 experimental paradigms employed to study acute degeneration, which is missing in the models  
328 of chronic neurodegeneration. This is that in all acute models, injury has to be simulated to

329 create the acute condition and this may set in motion a series of events that “activate” the Wld<sup>S</sup>  
330 protective pathway. This is never done in models of chronic neurodegeneration so it is  
331 conceivable that in those models the protective effect of Wld<sup>S</sup> is not induced due to inadequate

332 “activation” of the pathway that Wld<sup>S</sup> acts upon. This would limit the impact of Wld<sup>S</sup> on the  
333 ensuing neurodegeneration. Where there is partial rescue of phenotype in chronic models, the  
334 Wld<sup>S</sup> pathway may start to become “activated” as the degeneration sets in. “Activation” of the

335 Wld<sup>S</sup> pathway by simulating injury or established neurodegeneration is a novel concept. There  
336 is no precedence for this idea from studies published to date because no one has reported  
337 overlaying an acute injury in a chronic model. Our data indicates that Wld<sup>S</sup> behaves differently

338 in uninjured axons compared to injured ones – the mechanisms responsible for this need to be  
339 elucidated.

340 [Activation of the Wld<sup>S</sup>-protective pathway prevents as well as halts progression of tau-](#)  
341 [mediated degeneration](#)

342 The axonal degeneration observed in hTau<sup>0N3R</sup> transgenic flies was characterised by axonal  
343 swellings, which are indicative of the early stages of axonal degeneration caused by human tau.  
344 Axonal swellings are not a feature of Wallerian degeneration in the peripheral nervous system,  
345 however they have been described following injury in the CNS (13) (51). Axonal swellings  
346 have also been observed in models of neurodegeneration, including AD (51) (52) (53) and  
347 tauopathy (54) (9), leading to suggestions that Wallerian-like degeneration is occurring in  
348 neurodegenerative diseases.

349

350 Upon activation of the Wld<sup>S</sup> pathway, we did not observe axonal swellings and there was a  
351 lack of any other feature of tau-mediated degeneration in hTau<sup>0N3R</sup>;Wld<sup>S</sup> axons. These tau-  
352 expressing axons looked as normal as the Wld<sup>S</sup> expressing controls, which previous studies  
353 have shown to be both morphologically normal, as well as physiologically functional (30). This  
354 protective effect was evident even when the Wld<sup>S</sup> pathway was activated in the hTau<sup>0N3R</sup>;Wld<sup>S</sup>  
355 axons at a time point after tau-mediated degeneration was established. This demonstrates that  
356 once activated, the Wld<sup>S</sup> protective pathway prevents emergence of tau-mediated degeneration  
357 as well as halting progression of already established degeneration.

358 [What is the mechanism by which activated Wld<sup>S</sup> pathway protects against hTau?](#)

359 Tau-mediated degeneration is dependent upon factors including total tau levels (55),  
360 phosphorylation at pathological sites (56) (35) and tau aggregation (57). The presence of  
361 human tau within hTau<sup>0N3R</sup>;Wld<sup>S</sup> axons, even weeks after activation of the Wld<sup>S</sup> pathway,  
362 indicates that the protection seen was not due to a reduction in total tau level as a result of loss  
363 of human tau from the axon. Nor is it likely to be due to any significant reduction in its  
364 phosphorylation status at the one pathological site, PHF1 (ser/thr 396 and 404) that we

365 examined. This surprising observation implies that upon activation, the Wld<sup>S</sup>-pathway acts to  
366 negate the degenerative effects of tau, despite the persistence of pathologically phosphorylated  
367 human tau within the axon. Nonetheless it is possible that this protective effect was conferred  
368 by reduced misfolding or phosphorylation at other pathological sites that have previously been  
369 implicated in tau-mediated degeneration in other *Drosophila* models of tauopathy, such as  
370 MC1 (57), AT100 (Thr212/Ser214) (58) or 12E8 (ser262/356) (35) or reduced aggregation of  
371 human tau remains to be determined by future studies. It is conceivable that Wld<sup>S</sup> pathway  
372 activation may influence tau phosphorylation at other sites as well as modulate tau aggregation,  
373 as several isoforms of NMNAT, one of which is a component of Wld<sup>S</sup> fusion protein, have  
374 been shown to act as potent chaperones of phosphorylated tau, preventing its aggregation *in*  
375 *vitro* (37). This report, and others like it which implicate NMNAT in modulation of tau-  
376 mediated toxicity in other experimental models (38) (39), suggest that activation of Wld<sup>S</sup>  
377 pathway does not act downstream of tau, and instead there are some key points of intersection.  
378  
379 A better understanding of the mechanisms that underpin the Wld<sup>S</sup> protective pathway may  
380 highlight commonalities with hTau mediated degeneration and thus identify potential points of  
381 intersection at which protection is conferred. A key component of the Wld<sup>S</sup> pathway is the  
382 NAD<sup>+</sup> salvage pathway, which has recently also been linked with AD (59). Wld<sup>S</sup> contains  
383 nicotinamide mononucleotide adenylyl transferase 1 (NMNAT1) (60) (61), which is the final  
384 enzyme in the NAD<sup>+</sup> salvage pathway in mammals, and the biosynthetic activity of NMNAT1  
385 is required for the full Wld<sup>S</sup> protective phenotype (62) (63). One isoform in mammals  
386 (NMNAT2) and the sole *Drosophila* homolog dNMNAT are rapidly lost upon injury and this  
387 is associated with degeneration (64). Wld<sup>S</sup> is believed to compensate for the loss of NMNAT  
388 in injured Wld<sup>S</sup> expressing axons, thereby preventing loss of NAD<sup>+</sup> and activation of the  
389 downstream pro-degenerative pathway. dSarm/Sarm1 (32) and Highwire/PHR1 (34) are



390 endogenous mediators of axon degeneration that affect levels of NMNAT, with Axundead (30)  
391 and Pebbled (65) identified downstream of the loss of NMNAT. Knockout of these endogenous  
392 mediators results in axon survival after injury. We postulate that the Wld<sup>S</sup> protective pathway  
393 would not be activated in uninjured hTau;Wld<sup>S</sup> expressing axons, and so its protective effects  
394 would not be evident. Upon activation, the Wld<sup>S</sup> pathway may confer protection against tau-  
395 mediated degeneration because its downstream components are switched on and can interact  
396 directly with pathological tau. Supporting this, it has been shown that NMNAT prevents tau-  
397 mediated aggregation *in vitro*, acts as chaperone for proteolysis of tau in rodent models and  
398 promotes clearance of tau oligomers leading to suppression of tau-induced degeneration in  
399 *Drosophila* models of tauopathy (38) (37, 39) (39). Alternatively, protection may be conferred  
400 indirectly due to downstream neuroprotective effects of Wld<sup>S</sup> pathway activation, such as  
401 enhanced mitochondrial calcium buffering (66), or reduced oxidative stress (67) negating tau-  
402 mediated dysregulation in intracellular calcium and/or tau-mediated mitochondrial dysfunction  
403 (68) (59) or oxidative stress (43). Future studies will be required to identify the exact point at  
404 which the activated Wld<sup>S</sup> pathway intersects with and therefore protects against tau-mediated  
405 degeneration. In particular it will be vital to explore whether expression of downstream  
406 mediators of the Wld<sup>S</sup> pathway that potentially block injury-induced axon degeneration (such  
407 as NMNAT, dSarm, axed, highwire, or even NAD<sup>+</sup>) also modulate tau-mediated degeneration  
408 to emulate Wld<sup>S</sup> pathway activation.

## 409 Conclusion

410 We show that activation of the Wld<sup>S</sup>-pathway reliably protects against tau-mediated axonal  
411 degeneration, almost abolishing it. It is vital to understand how engagement of this pathway  
412 and its downstream mediators interact with tau, whether directly or indirectly, to halt tau-  
413 mediated axonal degeneration. This will yield important clues about the mechanisms  
414 underpinning tau-mediated axonal degeneration as well as enable identification of novel drug

415 targets that can emulate the complete protection we report here, to truly halt tau-mediated  
416 degeneration in all tauopathies.

#### 417 [Acknowledgements](#)

418 This study was funded by The Gerald Kerkut Charitable Trust.

#### 419 [Conflicts of Interest](#)

420 The authors declare no conflicts of interest.

421

422 **References**

- 423 1. McAleese KE, Walker L, Graham S, Moya ELJ, Johnson M, Erskine D, et al. Parietal  
424 white matter lesions in Alzheimer's disease are associated with cortical neurodegenerative  
425 pathology, but not with small vessel disease. *Acta Neuropathol.* 2017;134(3):459-73.
- 426 2. Huang J, Friedland RP, Auchus AP. Diffusion tensor imaging of normal-appearing  
427 white matter in mild cognitive impairment and early Alzheimer disease: preliminary evidence  
428 of axonal degeneration in the temporal lobe. *AJNR Am J Neuroradiol.* 2007;28(10):1943-8.
- 429 3. Sun X, Salat D, Upchurch K, Deason R, Kowall N, Budson A, et al. Destruction of  
430 white matter integrity in patients with mild cognitive impairment and Alzheimer disease. *J*  
431 *Investig Med.* 2014;62(7):927-33.
- 432 4. Kanaan NM, Morfini GA, LaPointe NE, Pigino GF, Patterson KR, Song Y, et al.  
433 Pathogenic forms of tau inhibit kinesin-dependent axonal transport through a mechanism  
434 involving activation of axonal phosphotransferases. *J Neurosci.* 2011;31(27):9858-68.
- 435 5. Mudher A, Shepherd D, Newman TA, Mildren P, Jukes JP, Squire A, et al. GSK-3beta  
436 inhibition reverses axonal transport defects and behavioural phenotypes in *Drosophila*. *Mol*  
437 *Psychiatry.* 2004;9(5):522-30.
- 438 6. Kim J, Choi IY, Michaelis ML, Lee P. Quantitative in vivo measurement of early  
439 axonal transport deficits in a triple transgenic mouse model of Alzheimer's disease using  
440 manganese-enhanced MRI. *Neuroimage.* 2011;56(3):1286-92.
- 441 7. Cowan CM, Bossing T, Page A, Shepherd D, Mudher A. Soluble hyper-phosphorylated  
442 tau causes microtubule breakdown and functionally compromises normal tau in vivo. *Acta*  
443 *Neuropathol.* 2010;120(5):593-604.
- 444 8. Lin WL, Lewis J, Yen SH, Hutton M, Dickson DW. Ultrastructural neuronal pathology  
445 in transgenic mice expressing mutant (P301L) human tau. *J Neurocytol.* 2003;32(9):1091-105.
- 446 9. Probst A, Gotz J, Wiederhold KH, Tolnay M, Mistl C, Jaton AL, et al. Axonopathy and  
447 amyotrophy in mice transgenic for human four-repeat tau protein. *Acta Neuropathol.*  
448 2000;99(5):469-81.
- 449 10. Sahara N, Perez PD, Lin WL, Dickson DW, Ren Y, Zeng H, et al. Age-related decline  
450 in white matter integrity in a mouse model of tauopathy: an in vivo diffusion tensor magnetic  
451 resonance imaging study. *Neurobiol Aging.* 2014;35(6):1364-74.
- 452 11. Waller A. Experiments on the section of the glossopharyngeal and hypoglossal nerves  
453 of the frog, and observations of the alterations produced thereby in the structure of their  
454 primitive fibres. *Phil Trans Royal Soc London* 1850;140::423-9.
- 455 12. Tang-Schomer MD, Johnson VE, Baas PW, Stewart W, Smith DH. Partial interruption  
456 of axonal transport due to microtubule breakage accounts for the formation of periodic  
457 varicosities after traumatic axonal injury. *Exp Neurol.* 2012;233(1):364-72.
- 458 13. Beirowski B, Nogradi A, Babetto E, Garcia-Alias G, Coleman MP. Mechanisms of  
459 axonal spheroid formation in central nervous system Wallerian degeneration. *J Neuropathol*  
460 *Exp Neurol.* 2010;69(5):455-72.

- 461 14. Shemesh OA, Erez H, Ginzburg I, Spira ME. Tau-induced traffic jams reflect  
462 organelles accumulation at points of microtubule polar mismatching. *Traffic*. 2008;9(4):458-  
463 71.
- 464 15. Park JY, Jang SY, Shin YK, Koh H, Suh DJ, Shinji T, et al. Mitochondrial swelling and  
465 microtubule depolymerization are associated with energy depletion in axon degeneration.  
466 *Neuroscience*. 2013;238:258-69.
- 467 16. Trimmer PA, Swerdlow RH, Parks JK, Keeney P, Bennett JP, Jr., Miller SW, et al.  
468 Abnormal mitochondrial morphology in sporadic Parkinson's and Alzheimer's disease cybrid  
469 cell lines. *Exp Neurol*. 2000;162(1):37-50.
- 470 17. Wirths O, Weis J, Kaye R, Saido TC, Bayer TA. Age-dependent axonal degeneration  
471 in an Alzheimer mouse model. *Neurobiol Aging*. 2007;28(11):1689-99.
- 472 18. Lunn ER, Perry VH, Brown MC, Rosen H, Gordon S. Absence of Wallerian  
473 Degeneration does not Hinder Regeneration in Peripheral Nerve. *Eur J Neurosci*. 1989;1(1):27-  
474 33.
- 475 19. Conforti L, Gilley J, Coleman MP. Wallerian degeneration: an emerging axon death  
476 pathway linking injury and disease. *Nat Rev Neurosci*. 2014;15(6):394-409.
- 477 20. Ding C, Hammarlund M. Mechanisms of injury-induced axon degeneration. *Curr Opin*  
478 *Neurobiol*. 2019;57:171-8.
- 479 21. Llobet Rosell A, Neukomm LJ. Axon death signalling in Wallerian degeneration  
480 among species and in disease. *Open Biol*. 2019;9(8):190118.
- 481 22. Coleman MP, Hoke A. Programmed axon degeneration: from mouse to mechanism to  
482 medicine. *Nat Rev Neurosci*. 2020;21(4):183-96.
- 483 23. Kaneko S, Wang J, Kaneko M, Yiu G, Hurrell JM, Chitnis T, et al. Protecting axonal  
484 degeneration by increasing nicotinamide adenine dinucleotide levels in experimental  
485 autoimmune encephalomyelitis models. *J Neurosci*. 2006;26(38):9794-804.
- 486 24. Hasbani DM, O'Malley KL. Wld(S) mice are protected against the Parkinsonian  
487 mimetic MPTP. *Exp Neurol*. 2006;202(1):93-9.
- 488 25. Sajadi A, Schneider BL, Aebischer P. Wlds-mediated protection of dopaminergic fibers  
489 in an animal model of Parkinson disease. *Curr Biol*. 2004;14(4):326-30.
- 490 26. Meyer zu Horste G, Miesbach TA, Muller JI, Fledrich R, Stassart RM, Kieseier BC, et  
491 al. The Wlds transgene reduces axon loss in a Charcot-Marie-Tooth disease 1A rat model and  
492 nicotinamide delays post-traumatic axonal degeneration. *Neurobiol Dis*. 2011;42(1):1-8.
- 493 27. Samsam M, Mi W, Wessig C, Zielasek J, Toyka KV, Coleman MP, et al. The Wlds  
494 mutation delays robust loss of motor and sensory axons in a genetic model for myelin-related  
495 axonopathy. *J Neurosci*. 2003;23(7):2833-9.
- 496 28. Wang MS, Davis AA, Culver DG, Glass JD. WldS mice are resistant to paclitaxel  
497 (taxol) neuropathy. *Ann Neurol*. 2002;52(4):442-7.

- 498 29. Fang Y, Soares L, Teng X, Geary M, Bonini NM. A novel *Drosophila* model of nerve  
499 injury reveals an essential role of Nmnat in maintaining axonal integrity. *Curr Biol.*  
500 2012;22(7):590-5.
- 501 30. Neukomm LJ, Burdett TC, Seeds AM, Hampel S, Coutinho-Budd JC, Farley JE, et al.  
502 Axon Death Pathways Converge on Axundead to Promote Functional and Structural Axon  
503 Disassembly. *Neuron.* 2017;95(1):78-91 e5.
- 504 31. Neukomm LJ, Burdett TC, Gonzalez MA, Zuchner S, Freeman MR. Rapid in vivo  
505 forward genetic approach for identifying axon death genes in *Drosophila*. *Proc Natl Acad Sci*  
506 *U S A.* 2014;111(27):9965-70.
- 507 32. Osterloh JM, Yang J, Rooney TM, Fox AN, Adalbert R, Powell EH, et al. dSarm/Sarm1  
508 is required for activation of an injury-induced axon death pathway. *Science.*  
509 2012;337(6093):481-4.
- 510 33. Paglione M, Rosell AL, Chatton JY, Neukomm LJ. Morphological and Functional  
511 Evaluation of Axons and their Synapses during Axon Death in *Drosophila melanogaster*. *J Vis*  
512 *Exp.* 2020(157).
- 513 34. Xiong X, Hao Y, Sun K, Li J, Li X, Mishra B, et al. The Highwire ubiquitin ligase  
514 promotes axonal degeneration by tuning levels of Nmnat protein. *PLoS biology.*  
515 2012;10(12):e1001440.
- 516 35. Nishimura I, Yang Y, Lu B. PAR-1 kinase plays an initiator role in a temporally ordered  
517 phosphorylation process that confers tau toxicity in *Drosophila*. *Cell.* 2004;116(5):671-82.
- 518 36. Papanikolopoulou K, Roussou IG, Gouzi JY, Samiotaki M, Panayotou G, Turin L, et  
519 al. *Drosophila* Tau Negatively Regulates Translation and Olfactory Long-Term Memory, But  
520 Facilitates Footshock Habituation and Cytoskeletal Homeostasis. *J Neurosci.*  
521 2019;39(42):8315-29.
- 522 37. Ma X, Zhu Y, Lu J, Xie J, Li C, Shin WS, et al. Nicotinamide mononucleotide  
523 adenylyltransferase uses its NAD(+) substrate-binding site to chaperone phosphorylated Tau.  
524 *Elife.* 2020;9.
- 525 38. Ali YO, Allen HM, Yu L, Li-Kroeger D, Bakhshizadehmahmoudi D, Hatcher A, et al.  
526 NMNAT2:HSP90 Complex Mediates Proteostasis in Proteinopathies. *PLoS Biol.*  
527 2016;14(6):e1002472.
- 528 39. Ali YO, Ruan K, Zhai RG. NMNAT suppresses tau-induced neurodegeneration by  
529 promoting clearance of hyperphosphorylated tau oligomers in a *Drosophila* model of  
530 tauopathy. *Hum Mol Genet.* 2012;21(2):237-50.
- 531 40. Eric D Hoopfer 1 TM, Ryan J Watts, Oren Schuldiner, Dennis D M O'Leary, Liqun  
532 Luo. Wlds protection distinguishes axon degeneration following injury from naturally  
533 occurring developmental pruning. *Neuron.* 2006;15;50(6):883-95.
- 534 41. Sinadinos C, Cowan CM, Wyttenbach A, Mudher A. Increased throughput assays of  
535 locomotor dysfunction in *Drosophila* larvae. *J Neurosci Methods.* 2012;203(2):325-34.
- 536 42. MacDonald JM, Beach MG, Porpiglia E, Sheehan AE, Watts RJ, Freeman MR. The  
537 *Drosophila* cell corpse engulfment receptor Draper mediates glial clearance of severed axons.  
538 *Neuron.* 2006;50(6):869-81.

- 539 43. Chee F, Mudher A, Newman TA, Cuttle M, Lovestone S, Shepherd D. Overexpression  
540 of tau results in defective synaptic transmission in *Drosophila* neuromuscular junctions.  
541 *Biochem Soc Trans.* 2006;34(Pt 1):88-90.
- 542 44. Sealey MA, Vourkou E, Cowan CM, Bossing T, Quraishe S, Grammenoudi S, et al.  
543 Distinct phenotypes of three-repeat and four-repeat human tau in a transgenic model of  
544 tauopathy. *Neurobiol Dis.* 2017;105:74-83.
- 545 45. Fischer LR, Culver DG, Davis AA, Tennant P, Wang M, Coleman M, et al. The WldS  
546 gene modestly prolongs survival in the SOD1G93A fALS mouse. *Neurobiol Dis.* 2005;19(1-  
547 2):293-300.
- 548 46. Gultner S, Laue M, Riemer C, Heise I, Baier M. Prion disease development in slow  
549 Wallerian degeneration (Wld(S)) mice. *Neurosci Lett.* 2009;456(2):93-8.
- 550 47. Vande Velde C, Garcia ML, Yin X, Trapp BD, Cleveland DW. The neuroprotective  
551 factor Wlds does not attenuate mutant SOD1-mediated motor neuron disease. *Neuromolecular*  
552 *Med.* 2004;5(3):193-203.
- 553 48. Edgar JM, McLaughlin M, Yool D, Zhang SC, Fowler JH, Montague P, et al.  
554 Oligodendroglial modulation of fast axonal transport in a mouse model of hereditary spastic  
555 paraplegia. *J Cell Biol.* 2004;166(1):121-31.
- 556 49. Gillingwater TH, Haley JE, Ribchester RR, Horsburgh K. Neuroprotection after  
557 transient global cerebral ischemia in Wld(s) mutant mice. *J Cereb Blood Flow Metab.*  
558 2004;24(1):62-6.
- 559 50. Antenor-Dorsey JA, O'Malley KL. WldS but not *Nmnat1* protects dopaminergic  
560 neurites from MPP+ neurotoxicity. *Mol Neurodegener.* 2012;7:5.
- 561 51. Adalbert R, Nogradi A, Babetto E, Janeckova L, Walker SA, Kerschensteiner M, et al.  
562 Severely dystrophic axons at amyloid plaques remain continuous and connected to viable cell  
563 bodies. *Brain.* 2009;132(Pt 2):402-16.
- 564 52. Stokin GB, Lillo C, Falzone TL, Brusch RG, Rockenstein E, Mount SL, et al.  
565 Axonopathy and transport deficits early in the pathogenesis of Alzheimer's disease. *Science.*  
566 2005;307(5713):1282-8.
- 567 53. Tsai J, Grutzendler J, Duff K, Gan WB. Fibrillar amyloid deposition leads to local  
568 synaptic abnormalities and breakage of neuronal branches. *Nat Neurosci.* 2004;7(11):1181-3.
- 569 54. Shemesh OA, Spira ME. Hallmark cellular pathology of Alzheimer's disease induced  
570 by mutant human tau expression in cultured *Aplysia* neurons. *Acta Neuropathol.*  
571 2010;120(2):209-22.
- 572 55. Ubhi KK, Shaibah H, Newman TA, Shepherd D, Mudher A. A comparison of the  
573 neuronal dysfunction caused by *Drosophila* tau and human tau in a *Drosophila* model of  
574 tauopathies. *Invert Neurosci.* 2007;7(3):165-71.
- 575 56. Chatterjee S, Sang TK, Lawless GM, Jackson GR. Dissociation of tau toxicity and  
576 phosphorylation: role of GSK-3beta, MARK and Cdk5 in a *Drosophila* model. *Hum Mol*  
577 *Genet.* 2009;18(1):164-77.

- 578 57. Passarella D, Goedert M. Beta-sheet assembly of Tau and neurodegeneration in  
579 *Drosophila melanogaster*. *Neurobiol Aging*. 2018;72:98-105.
- 580 58. Jackson GR, Wiedau-Pazos M, Sang TK, Wagle N, Brown CA, Massachi S, et al.  
581 Human wild-type tau interacts with wingless pathway components and produces  
582 neurofibrillary pathology in *Drosophila*. *Neuron*. 2002;34(4):509-19.
- 583 59. Fang EF. Mitophagy and NAD(+) inhibit Alzheimer disease. *Autophagy*.  
584 2019;15(6):1112-4.
- 585 60. Conforti L, Tarlton A, Mack TG, Mi W, Buckmaster EA, Wagner D, et al. A  
586 Ufd2/D4Cole1e chimeric protein and overexpression of Rbp7 in the slow Wallerian  
587 degeneration (WldS) mouse. *Proc Natl Acad Sci U S A*. 2000;97(21):11377-82.
- 588 61. Mack TG, Reiner M, Beirowski B, Mi W, Emanuelli M, Wagner D, et al. Wallerian  
589 degeneration of injured axons and synapses is delayed by a Ube4b/Nmnat chimeric gene. *Nat*  
590 *Neurosci*. 2001;4(12):1199-206.
- 591 62. Avery MA, Sheehan AE, Kerr KS, Wang J, Freeman MR. Wld S requires Nmnat1  
592 enzymatic activity and N16-VCP interactions to suppress Wallerian degeneration. *J Cell Biol*.  
593 2009;184(4):501-13.
- 594 63. Beirowski B, Babetto E, Gilley J, Mazzola F, Conforti L, Janeckova L, et al. Non-  
595 nuclear Wld(S) determines its neuroprotective efficacy for axons and synapses in vivo. *J*  
596 *Neurosci*. 2009;29(3):653-68.
- 597 64. Gilley J, Coleman MP. Endogenous Nmnat2 is an essential survival factor for  
598 maintenance of healthy axons. *PLoS Biol*. 2010;8(1):e1000300.
- 599 65. Farley JE, Burdett TC, Barria R, Neukomm LJ, Kenna KP, Landers JE, et al.  
600 Transcription factor Pebbled/RREB1 regulates injury-induced axon degeneration. *Proc Natl*  
601 *Acad Sci U S A*. 2018;115(6):1358-63.
- 602 66. Avery MA, Rooney TM, Pandya JD, Wishart TM, Gillingwater TH, Geddes JW, et al.  
603 WldS prevents axon degeneration through increased mitochondrial flux and enhanced  
604 mitochondrial Ca<sup>2+</sup> buffering. *Curr Biol*. 2012;22(7):596-600.
- 605 67. Press C, Milbrandt J. Nmnat delays axonal degeneration caused by mitochondrial and  
606 oxidative stress. *J Neurosci*. 2008;28(19):4861-71.
- 607 68. Cieri D, Vicario M, Vallese F, D'Orsi B, Berto P, Grinzato A, et al. Tau localises within  
608 mitochondrial sub-compartments and its caspase cleavage affects ER-mitochondria  
609 interactions and cellular Ca(2+) handling. *Biochim Biophys Acta Mol Basis Dis*.  
610 2018;1864(10):3247-56.  
611  
612  
613  
614

615

616 **Figure legends**

617

618 Fig 1. Tau-mediated axonal swellings are not evident in hTau<sup>0N3R</sup>;Wld<sup>S</sup> axons in which Wld<sup>S</sup>  
619 pathway is activated. a) Axonal swellings (arrowheads) in naïve htau<sup>0N3R</sup>;Wld<sup>S</sup> axons where  
620 Wld<sup>S</sup> pathway has not been activated. b) These swellings do not appear in hTau<sup>0N3R</sup>;Wld<sup>S</sup>  
621 axons where Wld<sup>S</sup> has been activated, at any time point post-activation (pa). b) Quantification  
622 of coverage of axonal swellings. Values are presented as the mean ± SEM. n=6-10.  
623 P<0.0001.

624

625 Fig 2. Tau-mediated axonal swellings are halted from progressing upon activation of the  
626 Wld<sup>S</sup> pathway. a) Quantification of axonal swellings reveals that in naïve hTau<sup>0N3R</sup>;Wld<sup>S</sup>  
627 axons, where Wld<sup>S</sup> pathway has not been activated, the level of swellings increases  
628 significantly at 4 wks and 6 wks (n=7-8). b) In hTau<sup>0N3R</sup>;Wld<sup>S</sup> axons where Wld<sup>S</sup> has been  
629 activated the area covered by axonal swellings does not increase significantly over time post  
630 Wld<sup>S</sup> pathway activation (pa) (n=8-16). Values are presented as the mean ± SEM.  
631 \*\*\*P<0.001, \*\*\*\*P<0.0001.

632

633 Fig 3. Co-expression of Wld<sup>S</sup> with hTau<sup>0N3R</sup> does not delay tau-mediated axonal  
634 degeneration. At 1 week after eclosion all genotypes display normal olfactory receptor  
635 neuron (ORN) morphology (a). At 3 weeks after eclosion, axonal swellings are apparent in  
636 htau<sup>0N3R</sup> expressing ORNs with similar morphology observed in hTau<sup>0N3R</sup>;Wld<sup>S</sup> ORNs. b)  
637 Quantification of swelling coverage indicates that co-expression of Wld<sup>S</sup> does not delay the  
638 onset nor slow the progression of tau-mediated axonal degeneration. Values are presented as



639 the mean  $\pm$  SEM. n=6-11, \*\*\*\*P<0.0001. Wld<sup>S</sup>, slow Wallerian degeneration; hTau<sup>0N3R</sup>,  
640 0N3R human tau isoform; n.s., not significant.

641

642 Fig 4. Wld<sup>S</sup> does not improve tau-mediated axonal dysfunction. a) Expression of hTau<sup>0N3R</sup>

643 results in the appearance of vesicular aggregates, which are also apparent in hTau<sup>0N3R</sup>;Wld<sup>S</sup>

644 axons. b) No significant improvement in aggregate coverage was observed in hTau<sup>0N3R</sup>;Wld<sup>S</sup>

645 axons compared with hTau<sup>0N3R</sup> axons (n=10 larvae). c) hTau<sup>0N3R</sup> NMJs display aberrant

646 morphology, typified by thinning of the axon (arrowheads) and microsatellite boutons

647 (arrows), with this also observed in htau<sup>0N3R</sup>;Wld<sup>S</sup> NMJs (scale bar = 25  $\mu$ m). Co-expression

648 of Wld<sup>S</sup> with hTau<sup>0N3R</sup> did not rescue thinning of the inter-bouton axon (d) or the alterations

649 in bouton size (e) (n=4 larvae, 3-6 NMJs/larva). Analysis of locomotor behaviour indicated

650 that co-expression of hTau<sup>0N3R</sup>;Wld<sup>S</sup> did not significantly improve the hTau<sup>0N3R</sup>-mediated

651 alterations in f) meander – relative turning/distance travelled, g) angular velocity – relative

652 turning / time elapsed and h) velocity of larval crawling (n>17). Values are presented as the

653 mean  $\pm$  SEM. \*\*P<0.01; \*\*\*\*P<0.0001. Wld<sup>S</sup>, slow Wallerian degeneration; htau<sup>0N3R</sup>, 0N3R

654 human tau isoform; NMJs, neuromuscular junctions; Ctl, control.

655

656 Fig 5. Tau expression in naïve hTau<sup>0N3R</sup>;Wld<sup>S</sup> expressing axons is not different to

657 hTau<sup>0N3R</sup>;Wld<sup>S</sup> axons where Wld<sup>S</sup> pathway has been activated. Visualisation of the

658 membrane bound CD8-GFP protein shows extensive membrane fragmentation indicative of

659 axonal degeneration in naïve hTau<sup>0N3R</sup>;Wld<sup>S</sup> neurons at 6 weeks (green upper panels in A).

660 Human tau is found within both the axonal processes as well as axonal swellings as

661 visualised by a polyclonal anti-tau antibody (red upper panels in A). No such membrane

662 fragmentation is evident in 6 week old hTau<sup>0N3R</sup>;Wld<sup>S</sup> expressing axons (green lower panel in

663 A) even 5 weeks after Wld<sup>S</sup> pathway activation (pa) despite persisting human tau levels (red

664 lower panels in A). (B) Quantification shows no differences in levels of total human tau  
665 though there is a (non-significant) trend for a reduction in tau phosphorylated at PHF-1  
666 between naïve hTau<sup>0N3R</sup>;Wld<sup>S</sup> expressing axons and hTau<sup>0N3R</sup>;Wld<sup>S</sup> expressing axons where  
667 Wld<sup>S</sup> has been activated even 6 weeks post activation (pa). (n=5). Values are presented as the  
668 mean ± SEM (p>0.05).

669

670

671

672

673

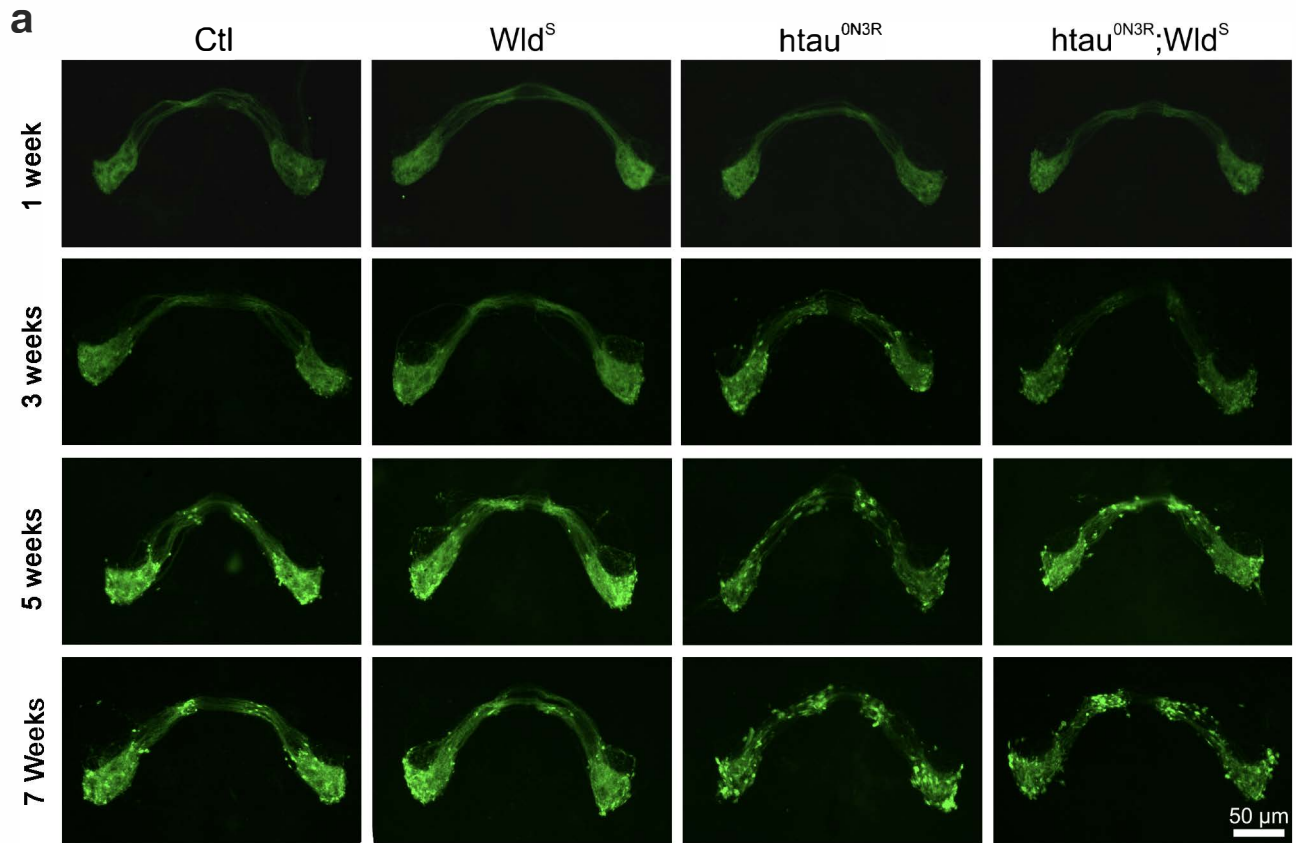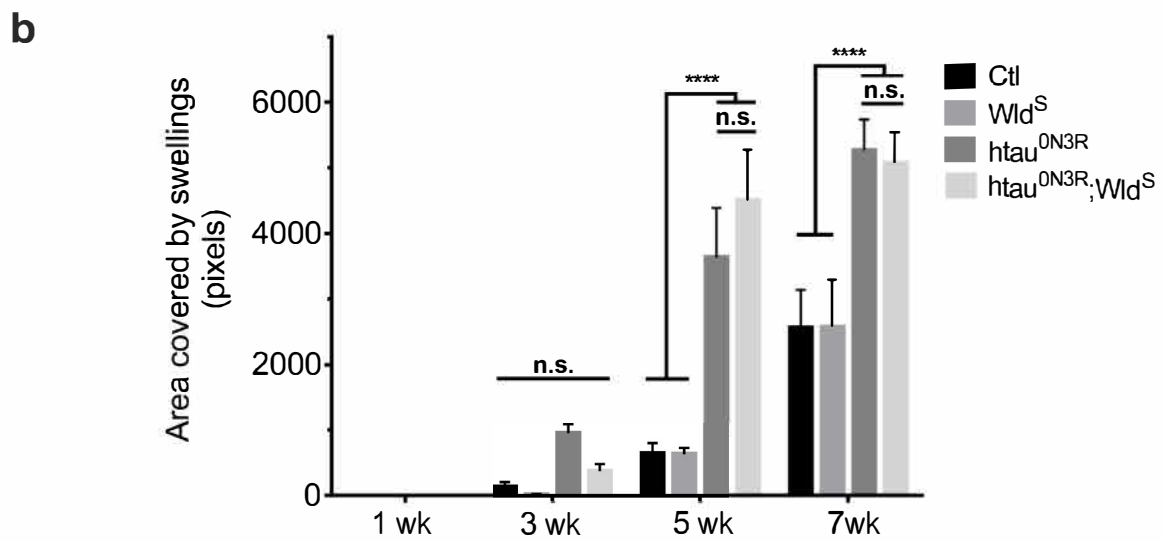

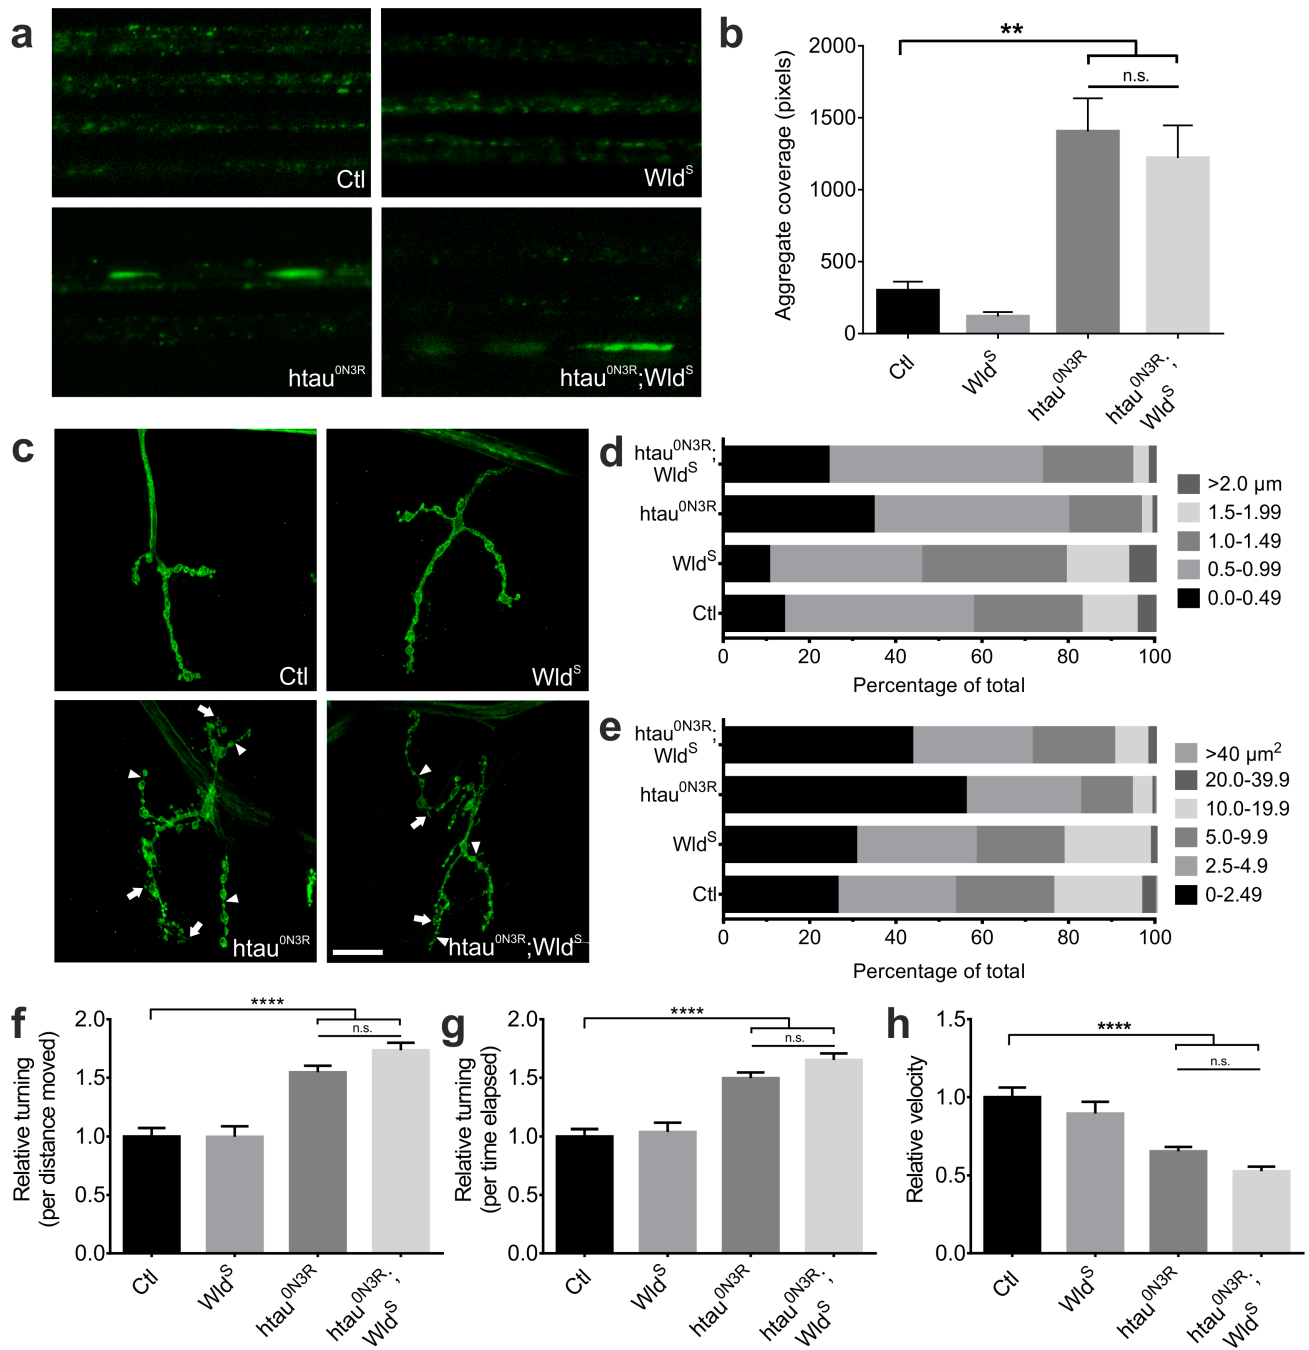

**a**

htau<sup>0N3R</sup>;Wld<sup>S</sup>

i. naive

ii. activated

3 week

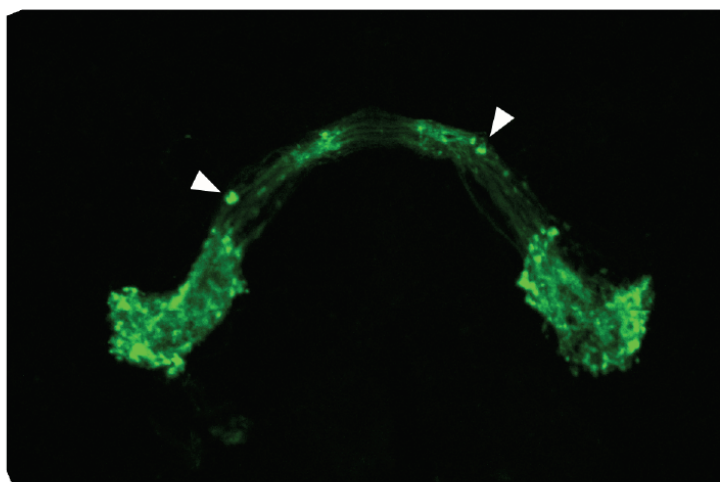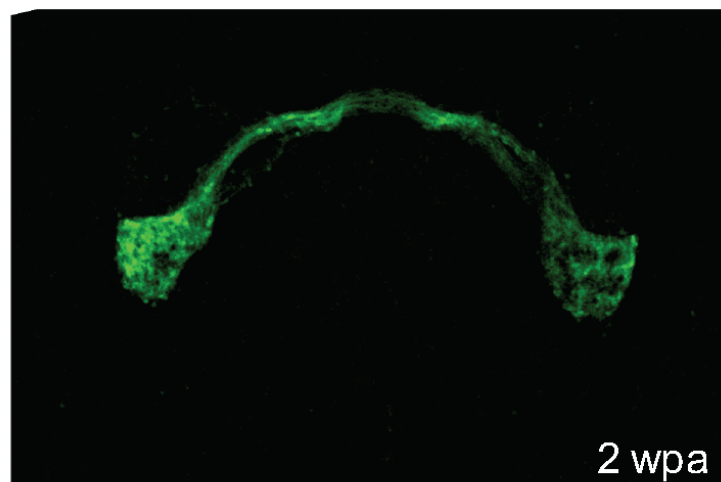

5 week

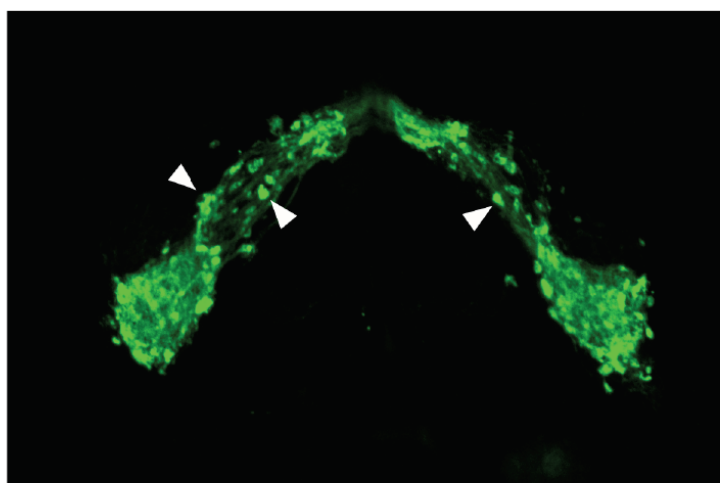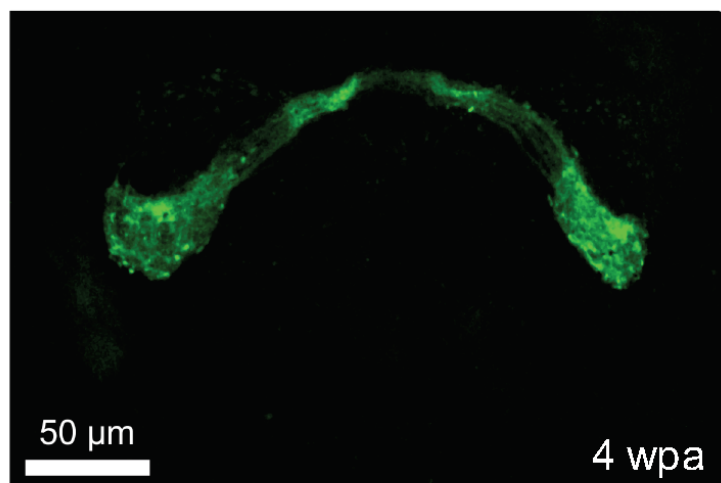

**b**

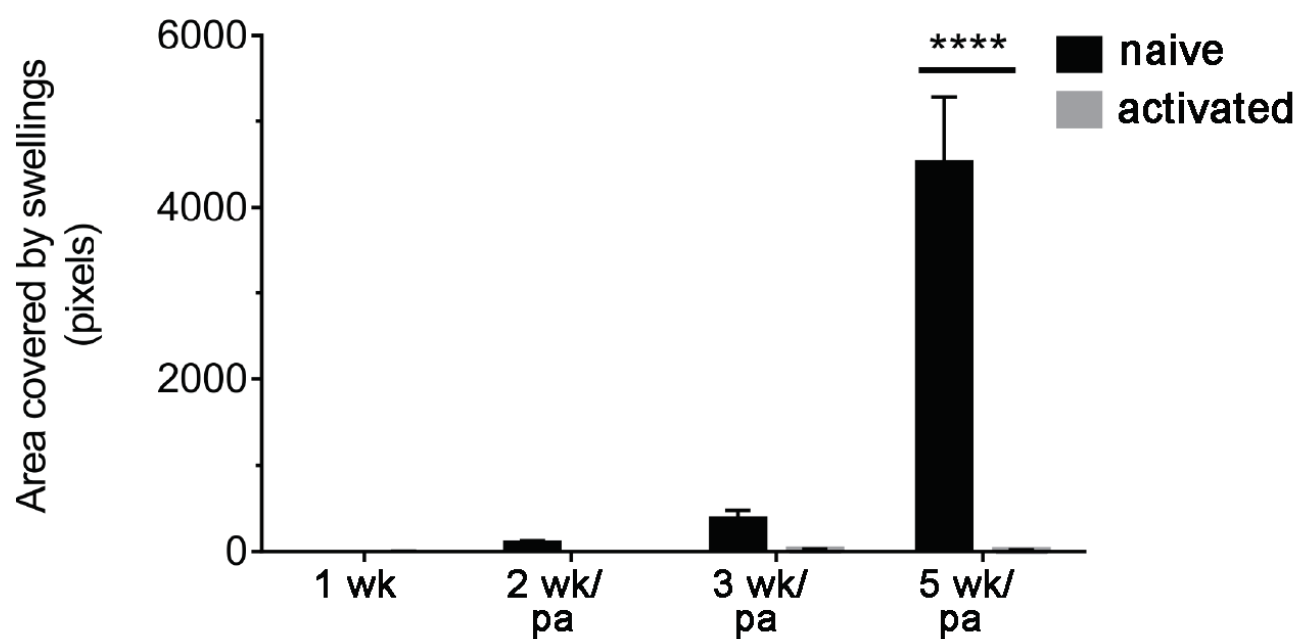

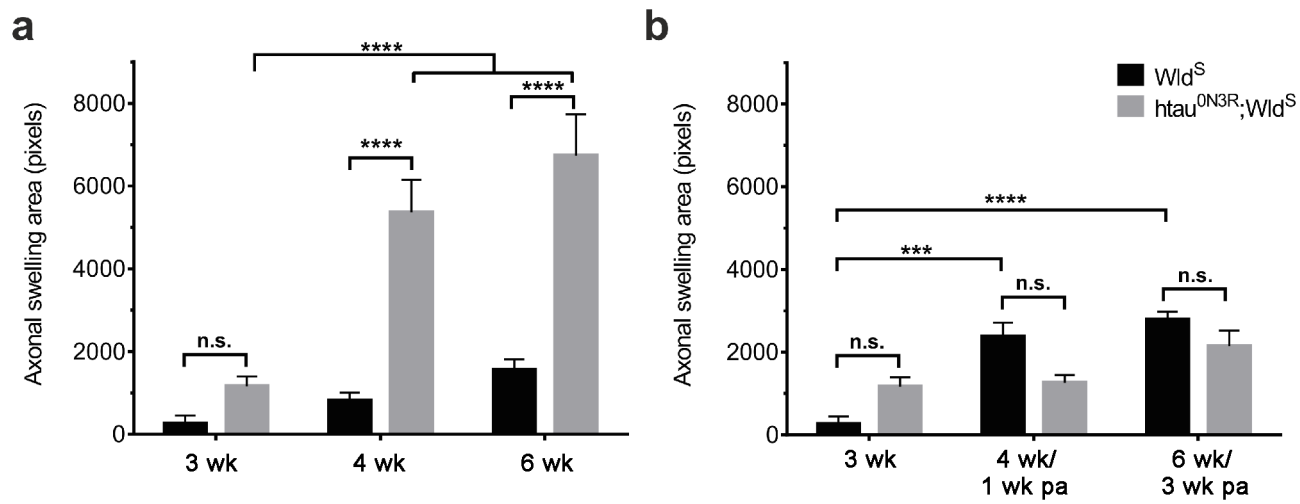

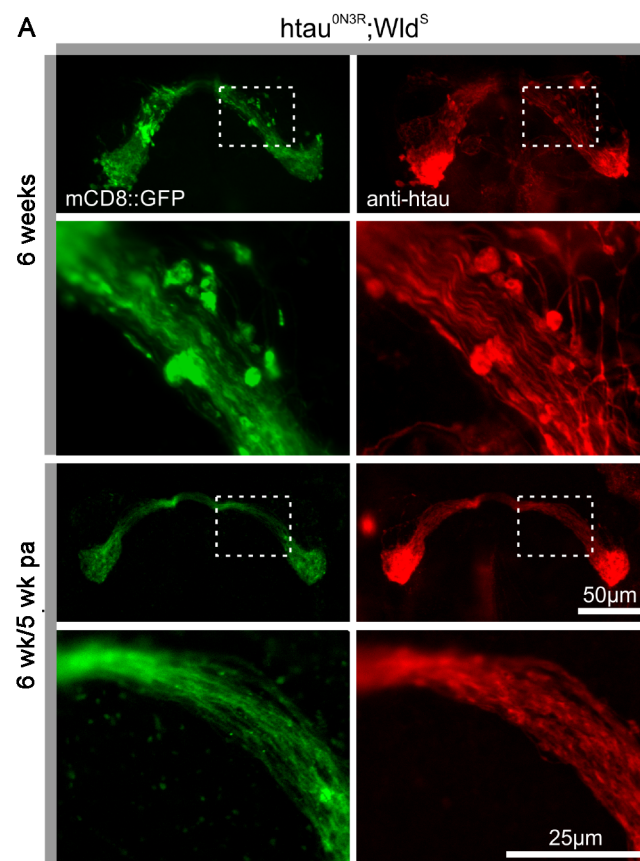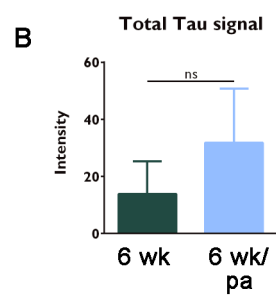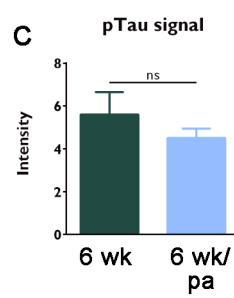

Source: https://www.biorxiv.org/content/10.1101/2020.12.06.408583v1.full.pdf
